# Supplementary material for: Accounting for Population Structure in Gene-by-Environment Interactions in Genome-Wide Association Studies Using Mixed Models
Source: PubMed Central journal article supplement (PMC4778803; doi:10.1371/journal.pgen.1005849), 2016-03-04
Supplement: pgen.1005849.s008.pdf [file pgen.1005849.s008.pdf]

S1 Table: Variance of phenotype explained by the genetic kinship matrix ( $\hat{\sigma}_g^2$ ), when estimated in the absence of a GxE effect. The GxE heritability is highly significant for many phenotypes in Table 1, which this table references for the variances explained. GCTA software, using the environmental factor as a covariate, is utilized to estimate the phenotypic variance and its standard error for each phenotype.

| Phenotype         | Variance explained by $K$ |       | Variance explained by $K^D$ |       | Variance explained by $K$ without GxE |       |
|-------------------|---------------------------|-------|-----------------------------|-------|---------------------------------------|-------|
|                   | $\hat{\sigma}_g^2$        | SE    | $\hat{\sigma}_d^2$          | SE    | $\hat{\sigma}_g^2$                    | SE    |
| bw                | 61.10%                    | 4.55% | 8.23%                       | 2.29% | 63.8%                                 | 4.05% |
| fat_mass          | 60.43%                    | 4.93% | 13.30%                      | 3.13% | 63.8%                                 | 3.96% |
| ffa               | 41.12%                    | 5.81% | 11.30%                      | 3.66% | 45.87%                                | 5.78% |
| ffp               | 45.00%                    | 6.76% | 28.34%                      | 5.58% | 56.03%                                | 4.34% |
| ffp_percentage    | 41.03%                    | 6.69% | 26.90%                      | 5.43% | 53.22%                                | 4.45% |
| free_fluid        | 36.00%                    | 5.01% | 7.68%                       | 2.62% | 39.61%                                | 4.48% |
| gfp               | 58.07%                    | 5.35% | 16.57%                      | 3.75% | 64.27%                                | 5.11% |
| gfp_percentage    | 58.91%                    | 5.18% | 14.86%                      | 3.47% | 66.14%                                | 4.76% |
| glucose_lc        | 35.82%                    | 5.85% | 17.05%                      | 4.17% | 44.19%                                | 6.26% |
| glucose           | 34.48%                    | 6.16% | 19.43%                      | 4.63% | 40.97%                                | 5.42% |
| hdl               | 60.82%                    | 4.39% | 4.51%                       | 1.67% | 59.21 %                               | 4.31% |
| ldl_and_vldl      | 40.63%                    | 5.02% | 6.21%                       | 2.35% | 42.58%                                | 4.95% |
| lean_mass         | 66.21%                    | 4.16% | 7.04%                       | 1.99% | 69.51%                                | 4.36% |
| mfp               | 48.07%                    | 5.37% | 12.05%                      | 3.21% | 53.06%                                | 5.58% |
| mfp_percentage    | 44.87%                    | 5.39% | 11.59%                      | 3.19% | 50.32%                                | 5.31% |
| nmr_bf_percentage | 61.60%                    | 4.88% | 13.45%                      | 3.13% | 67.24%                                | 4.31% |
| nmr_total_mass    | 55.82%                    | 5.10% | 12.56%                      | 3.08% | 62.72%                                | 5.56% |
| rfp               | 53.52%                    | 4.79% | 5.67%                       | 2.03% | 53.89%                                | 4.88% |
| rfp_percentage    | 48.75%                    | 4.93% | 5.70%                       | 2.12% | 49.91%                                | 5.00% |
| spleen_wt         | 52.11%                    | 4.93% | 5.58%                       | 2.14% | 54.81%                                | 4.79% |
| tc                | 65.33%                    | 4.05% | 3.26%                       | 1.34% | 65.90%                                | 4.11% |
| tg                | 34.53%                    | 5.72% | 15.68%                      | 4.00% | 42.89%                                | 6.01% |
| uc                | 57.35%                    | 4.99% | 7.45%                       | 2.59% | 60.28%                                | 4.14% |
